# Supplementary material
Source: PubMed Central journal article supplement (PMC4269302)
Supplement: NIHMS629964-supplement-supplement_1.pdf [file NIHMS629964-supplement-supplement_1.pdf]

**Table S1: Characteristics of Selected Cognitive Tests**

| Test                                 | Test Duration | No. of Questions | Test Characteristics                                                                               | No. of Studies | No. of Patients | References                                                                                                                                           |
|--------------------------------------|---------------|------------------|----------------------------------------------------------------------------------------------------|----------------|-----------------|------------------------------------------------------------------------------------------------------------------------------------------------------|
| Montreal Cognitive Assessment (MoCA) | 10 mins       | 30               | Using a cut-point of 25/26, sensitivity is 80-100% and specificity is 50-76% to detect MCI.        | 2              | 251             | Lee JY. J Geriatr Psychiatry Neurol. 2008; 21:104-110.<br>Markwick A. J Clin Exp Neuropsychol. 2012; 34:750-757.                                     |
| The Mini-Mental State Exam (MMSE)    | 7-10 mins     | 30               | Using cut-points of 27 or 28, sensitivity is 45-60% and specificity is 65-90% to detect MCI.       | 3              | 1,235           | Tariq SH. Am J Geriatr Psychiatry. 2006;14:900-910.<br>Kaufer DI. J Am Med Dir Assoc. 2008; 9:586-593.<br>Saxton J. Postgrad Med. 2009; 121:177-185. |
| Mini-cog test                        | ≤ 3 mins      | 4                | Using cut-point of 0-2, sensitivity is 39-84% and specificity is 78-88% to detect MCI or dementia. | 2              | 1001            | Borson S. Int J Geriatr Psychiatry. 2006; 21:349-355.<br>Holsinger T. JAGS. 2012; 60:1027-1036.                                                      |
